# Supplementary material for: An eConsultant versus a hospital-based outpatient consultation for general (internal) medicine: a costing analysis
Source: Springer Nature journal article supplement (doi:10.1186/s12913-023-09436-1), 2023-05-11
Supplement: MOESM1 [file 25346422]

# The Traditional Face-to-Face Outpatient Appointment Flow-Chart

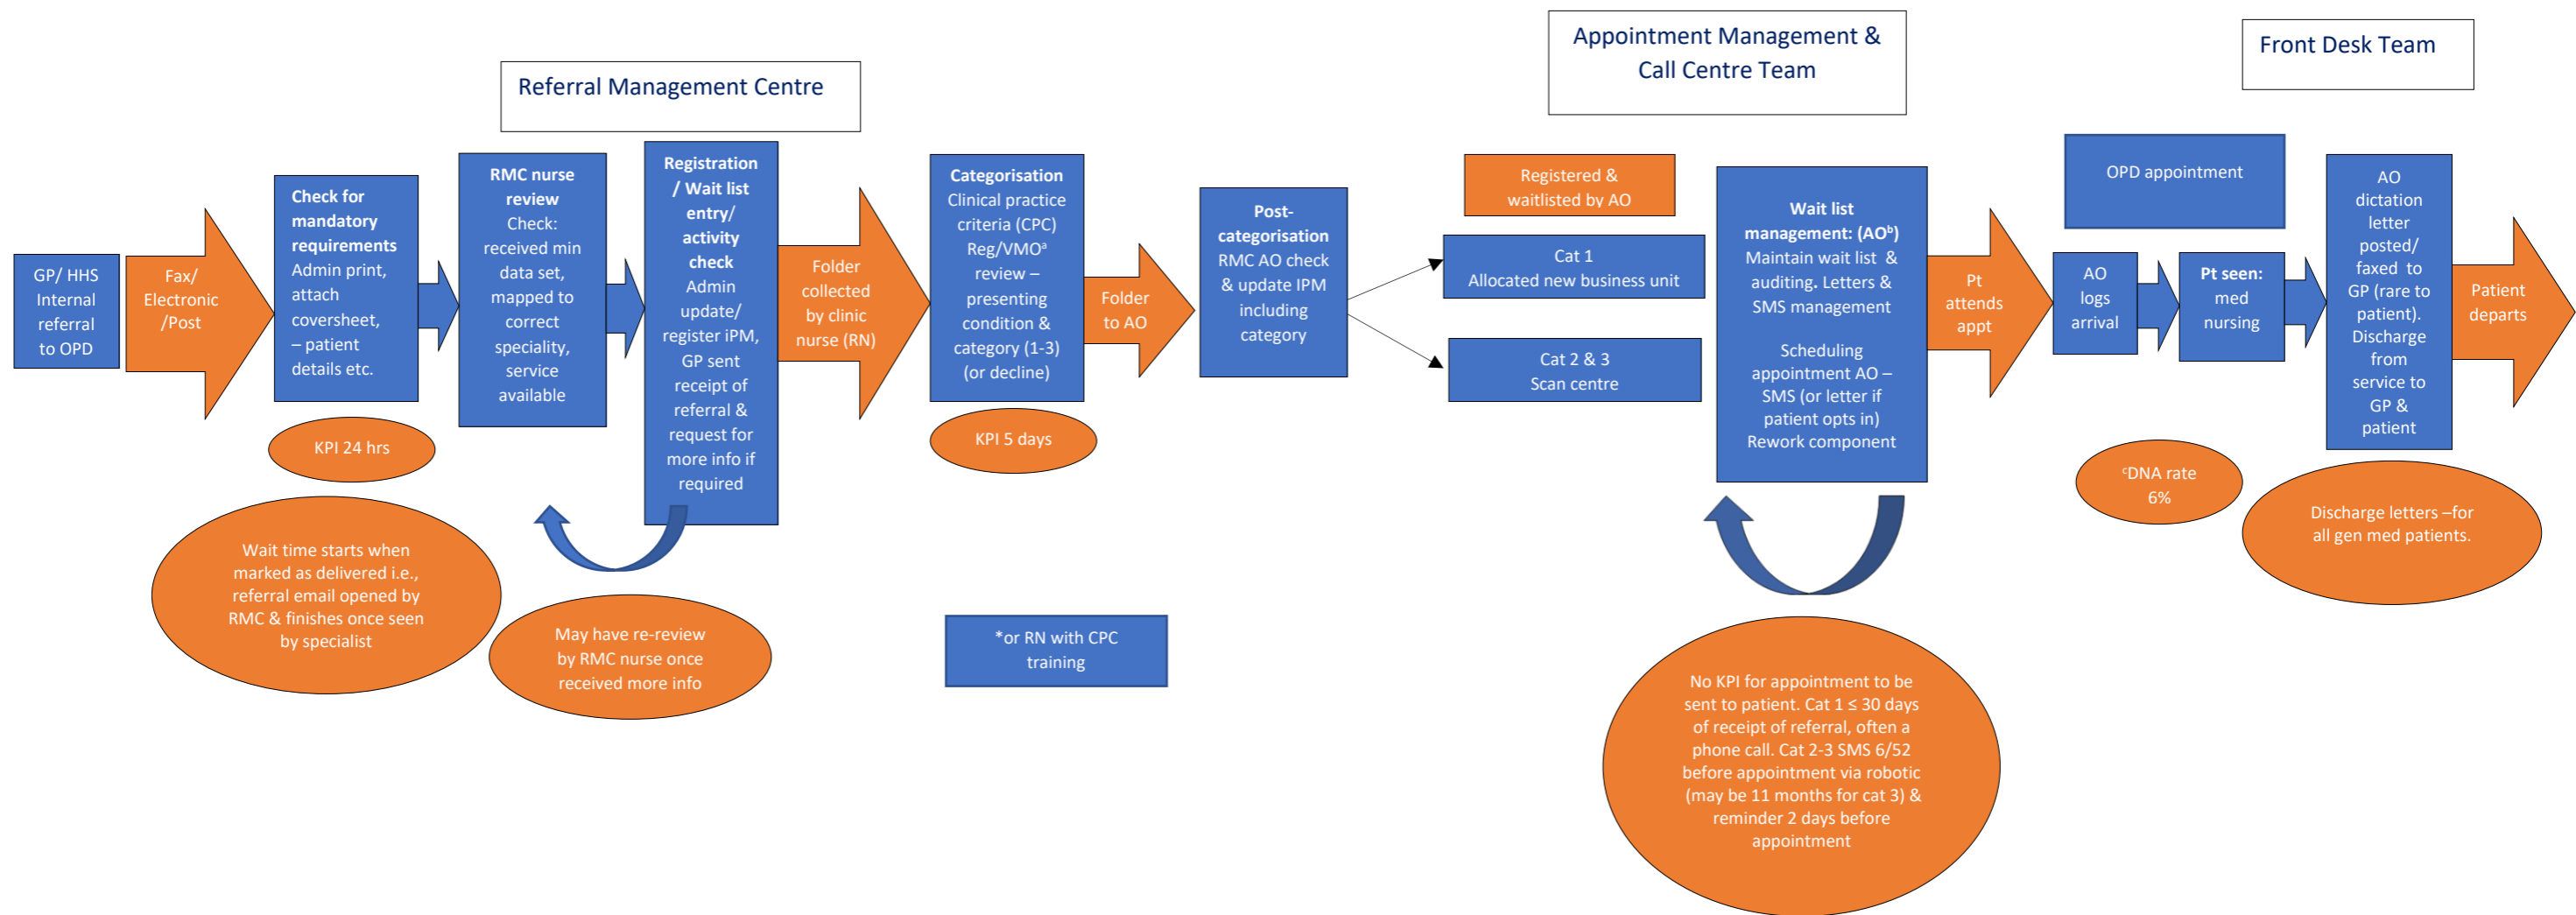

# Queensland eConsultant Partnership Program Flow-Chart

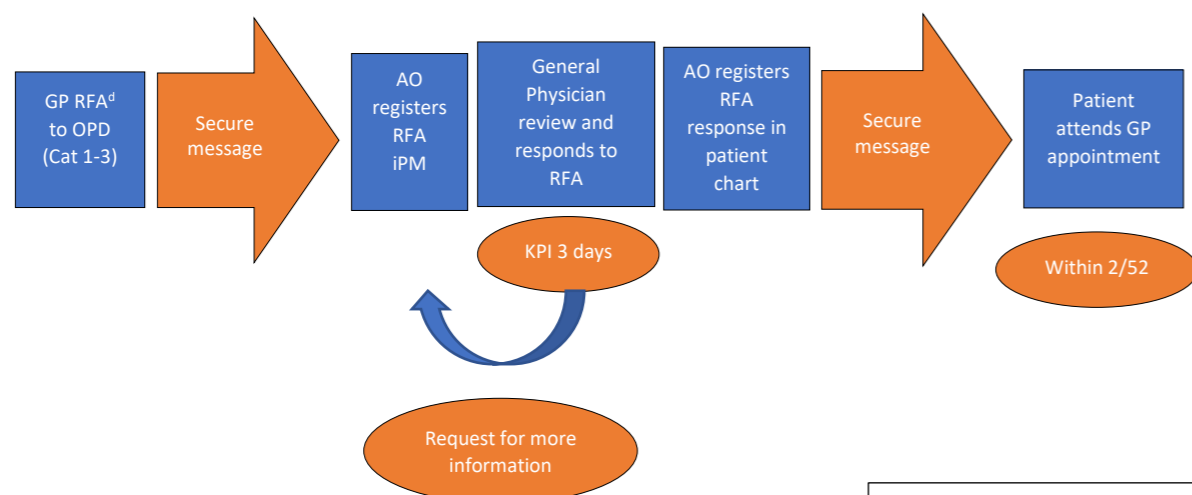

<sup>a</sup>VMO = Visiting Medical Office, <sup>b</sup>AO = Admin Office, <sup>c</sup> DNA = Did Not Arrive, <sup>d</sup>RFA = Request for Advice
